# Supplementary material
Source: Royal Society of Chemistry journal article supplement (doi:10.1039/d5ay01753j)
Supplement: d5ay01753j1.xlsx [file d5ay01753j1.xlsx]

## Sheet: Standard material
Total Number of conuts
Microplastics Counts > 0.8
Polymer	Replicate 1	Replicate 2	Replicate 3	Replicate 4	Replicate 5	Average	Std	CV
Polypropylene	74	75	75	75	71	74	1.73205	0.0234061
Polytetrafluoroethylene	35	34	34	35	37	35	1.22474	0.0349927
Sum of Microplastics	109	109	109	110	108	109	0.707107	0.00648722
Particle Counts (size ranges) > 0.8
Size Range	Replicate 1	Replicate 2	Replicate 3	Replicate 4	Replicate 5	Average	Std	CV
10 20	2	3	2	3	2	2.4	0.547723	0.228218
20 50	10	6	7	6	9	7.6	1.81659	0.239025
50 100	40	42	44	43	40	41.8	1.78885	0.0427956
100 200	37	37	35	37	37	36.6	0.894427	0.0244379
200 500	20	21	21	21	20	20.6	0.547723	0.0265885
>500	0	0	0	0	0	0	0	0
sum	109	109	109	110	108	109	0.707107	1
Sizing accuracy > 0.8
Polymer	Replicate 1	Replicate 2	Replicate 3	Replicate 4	Replicate 5	Average	Std	CV
Polypropylene	149.709	146	146	149	149.8	148.102	1.94344	0.0131223
Polytetrafluoroethylene	89.4954	79	79	82	82	82.2991	4.29342	0.0521685

## Sheet: Sample 
Total Number of conuts
Polymer	Replicate 1	Replicate 2	Replicate 3	Replicate 4	Replicate 5	Average	Std	CV
Acrylonitrile butadiene styrene	336	255	596	342	467	399.2	133.592	0.334648
Carbonate	1225	1148	914	1155	958	1080	135.752	0.125696
Cellulosic	3952	4041	4227	4374	3980	4114.8	180.205	0.0437943
Chitin	347	214	408	262	274	301	76.4591	0.254017
ISTD	15	27	31	25	21	23.8	6.09918	0.256268
Mg Stearate	172	233	202	333	211	230.2	61.4955	0.26714
Nitrile Examination Glove	267	252	182	243	189	226.6	38.5655	0.170192
Polyamide	557	387	777	507	679	581.4	151.416	0.260433
Polyamide (naturally occurring)	462	412	368	432	341	403	48.6621	0.12075
Polycarbonate	2	3	6	5	2	3.6	1.81659	0.504608
Polyethylene	75	67	63	67	56	65.6	6.91375	0
Polyethylene terephthalate	23	31	31	35	22	28.4	5.63915	0
Polylactic acid	0	1	5	0	2	1.6	2.07364	1.29603
Polymethyl methacrylate	1	0	1	1	0	0.6	0.547723	0.912871
Polyoxymethylene	12	13	23	15	17	16	4.3589	0
Polypropylene	51	49	57	67	52	55.2	7.22496	0.130887
Polystyrene	32	29	29	27	29	29.2	1.78885	0.0612621
Polytetrafluoroethylene	87	76	92	69	89	82.6	9.71082	0.117564
Polyurethane	104	91	68	88	57	81.6	18.8494	0.230998
polyvinyl chloride	10	4	6	7	4	6.2	2.48998	0.40161
Rubber	2356	2126	1867	2128	1774	2050.2	231.927	0.113124
Sand	231	203	183	194	180	198.2	20.4866	0.103363
PAN	0	0	0	0	0	0	0	0
Cellulose triacetate	0	0	0	0	0	0	0	0
SBR	0	0	0	0	0	0	0	0
Unknown	0	0	0	0	0	0	0	0
Cellulose acetate	0	0	0	0	0	0	0	0
Cellulose propionate	0	0	0	0	0	0	0	0
Celluose acetate butyrate	0	0	0	0	0	0	0	0
Sum of Particles	10317	9662	10136	10376	9404	9979	426.502	0.04274
Microplastics Counts > 0.8
Polymer	Replicate 1	Replicate 2	Replicate 3	Replicate 4	Replicate 5	Average	Std	CV
Polyethylene	9	10	6	9	5	7.8	2.16795	0.277942
Polypropylene	40	35	38	36	31	36	3.39116	0.094199
Polystyrene	30	27	24	24	27	26.4	2.50998	0
Polyvinyl chloride	1	2	1	2	1	1.4	0.547723	0.39123
Polyethylene terephthalate	5	4	3	3	2	3.4	1.14018	0.335346
Polycarbonate	1	2	0	1	2	1.2	0.83666	0
Polymethyl methacrylate	0	0	0	0	0	0	0	0
Polyamide	0	1	1	2	1	1	0.707107	0.707107
Polyurethane	31	27	20	21	18	23.4	5.41295	0.231323
Acrylonitrile butadiene styrene	29	23	19	23	18	22.4	4.3359	0.193567
Polyoxymethylene	6	5	6	7	5	5.8	0.83666	0.144252
Polytetrafluoroethylene	22	27	22	25	22	23.6	2.30217	0.0975497
Polylactic acid	0	0	0	0	0	0	0	0
PAN	0	0	0	0	0	0	0	0
Sum of Microplastics	174	163	140	153	132	152.4	16.9499	0.11122
Microplastics Counts (size ranges) Match Quaility > 0.8
Size Range	Replicate 1	Replicate 2	Replicate 3	Replicate 4	Replicate 5	Average	Std	CV
10-20	51	47	29	36	32	39	9.56556	0.245271
20-50	65	67	57	60	53	60.4	5.72713	0.09482
50-100	46	39	40	45	39	41.8	3.42053	0.0818308
100 - 200	12	10	13	12	8	11	2	0.181818
200-500	0	0	1	0	0	0.2	0.447214	2.23607
>500	0	0	0	0	0	0	0	0
Average Sizing Match Quality > 0.8
Polymer	Replicate 1	Replicate 2	Replicate 3	Replicate 4	Replicate 5	Average	Std	CV
Polyethylene	37.4292	33.4758	41.3501	34.2925	41.7379	37.6571	3.84537	0.102116
Polypropylene	35.5848	35.1015	39.9084	35.5904	34.4169	36.1204	2.17122	0.0601105
Polystyrene	37.5125	40.2923	42.328	42.2553	40.2268	40.523	1.96616	0.0485197
Polyvinyl chloride	34.5494	24.6227	34.0856	24.2325	32.1638	29.9308	5.10458	0.170546
Polyethylene terephthalate	41.4896	49.4753	58.9734	53.4398	16.6819	44.012	16.552	0.376079
Polycarbonate	13.8198	11.9683		13.8198	11.626	12.8085	1.17609	0.0918211
Polymethyl methacrylate
Polyamide	15.2544	14.377	19.0691	19.0671	21.2536	17.8042	2.88706	0.162156
Polyurethane	68.8574	70.4121	90.6756	79.5197	82.7103	78.435	9.0192	0.114989
Acrylonitrile butadiene styrene	37.531	40.7216	46.1862	42.7548	38.5869	41.1561	3.45647	0.0839844
Polyoxymethylene	41.7348	43.8156	41.3455	36.7785	43.8473	41.5043	2.88287	0.0694595
Polytetrafluoroethylene	49.0267	37.3957	52.095	52.6505	57.8992	49.8134	7.6396	0.153364
Polylactic acid
Polyacrylonitirle
Average size	37.5263	36.5143	46.6017	39.491	38.2864	39.684	4.01707	0.101226
Min size (Quality > 0.8)
Polymer	Replicate 1	Replicate 2	Replicate 3	Replicate 4	Replicate 5	Average	Std	CV
Polyethylene	13.2314	11.2838	12.6157	15.451	11.9683	12.91	1.59514	0.123558
Polypropylene	10.555	10.555	10.555	10.555	10.555	10.555	0	0
Polystyrene	10.555	10.555	15.451	13.2314	14.3841	12.8353	2.22467	0.173325
Polyvinyl chloride	34.5494	14.9271	34.0856	13.2314	32.1638	25.7915	10.7458	0.416643
Polyethylene terephthalate	10.555	14.3841	13.8198	13.8198	13.8198	13.2797	1.54261	0.116163
Polycarbonate	13.8198	11.9683		13.8198	11.2838	12.7229	1.29701	0.101943
Polymethyl methacrylate
Polyamide	10.555	12.6157	14.3841	12.6157	14.9271	13.0195	1.72486	0.132483
Polyurethane	11.2838	11.9683	45.835	24.2667	22.5676	23.1843	13.9824	0.603097
Acrylonitrile butadiene styrene	10.555	11.9683	10.555	10.555	11.9683	11.1203	0.774068	0.0696084
Polyoxymethylene	15.9577	13.8198	16.4488	11.2838	14.9271	14.4874	2.05615	0.141927
Polytetrafluoroethylene	11.2838	10.555	17.8412	16.9257	12.6157	13.8443	3.33	0.240533
PAN
Polylactic acid
Max Size (Quality > 0.8)
Polymer	Replicate 1	Replicate 2	Replicate 3	Replicate 4	Replicate 5	Average	Std	CV
Polyethylene	90.0939	86.7642	88.7591	87.9485	86.9475	88.1026	1.37345	0.0155892
Polypropylene	161.756	159.577	209.131	160.522	160.224	170.242	21.7541	0.127783
Polystyrene	103.802	102.723	103.571	103.571	102.49	103.231	0.584089	0.00565805
Polyvinyl chloride	34.5494	34.3183	34.0856	35.2336	32.1638	34.0702	1.14886	0.0337205
Polyethylene terephthalate	126.094	121.334	119.948	125.016	19.5441	102.387	46.3799	0.452986
Polycarbonate	13.8198	11.9683		13.8198	11.9683	12.894	1.06896	0.0829038
Polymethyl methacrylate
Polyamide	25.5448	17.8412	25.2313	28.4902	27.3501	24.8915	4.16064	0.167151
Polyurethane	180.232	175.625	178.279	157.923	171.87	172.786	8.88014	0.051394
Acrylonitrile butadiene styrene	93.39	104.337	157.671	105.851	79.1878	108.087	29.7017	0.274793
Polyoxymethylene	101.004	98.7735	99.9746	99.8153	98.4507	99.6036	1.02009	0.0102415
Polytetrafluoroethylene	147.069	103.418	103.725	109.4	234.631	139.649	56.1134	0.401819
Polylactic acid
PAN
